# Supplementary material for: Improving interfacial electron transfer and light harvesting in dye-sensitized solar cells by using Ag nanowire/TiO2 nanoparticle composite films
Source: Royal Society of Chemistry journal article supplement (doi:10.1039/c5ra12192b), 2015-01-01
Supplement: c5ra12192b1.pdf [file c5ra12192b1.pdf]

## Electronic Supplementary Information (ESI)

### Title

Improving interfacial electron transfer and light harvesting in dye-sensitized solar cells by using Ag nanowire/TiO<sub>2</sub> nanoparticle composite films

### Authors

Po-Chun Huang,<sup>a</sup> Tsan-Yao Chen,<sup>\*ab</sup> Yi-Lin Wang,<sup>a</sup> Chiun-Yi Wu<sup>a</sup> and Tsang-Lang Lin<sup>\*a</sup>

### Affiliation

- a. Department of Engineering and System Science, National Tsing Hua University, Hsinchu 30013, Taiwan. E-mail: tllin@mx.nthu.edu.tw; Tel.: +886 3 5742671; Fax: +886 3 5728445.
- b. Institute of Nuclear Engineering and Science, National Tsing Hua University, Hsinchu 30013, Taiwan. E-mail: chencaeser@gmail.com; Tel.: +886 3 5742671; Fax: +886 3 5728445.

## 1. Characteristics of AgNWs

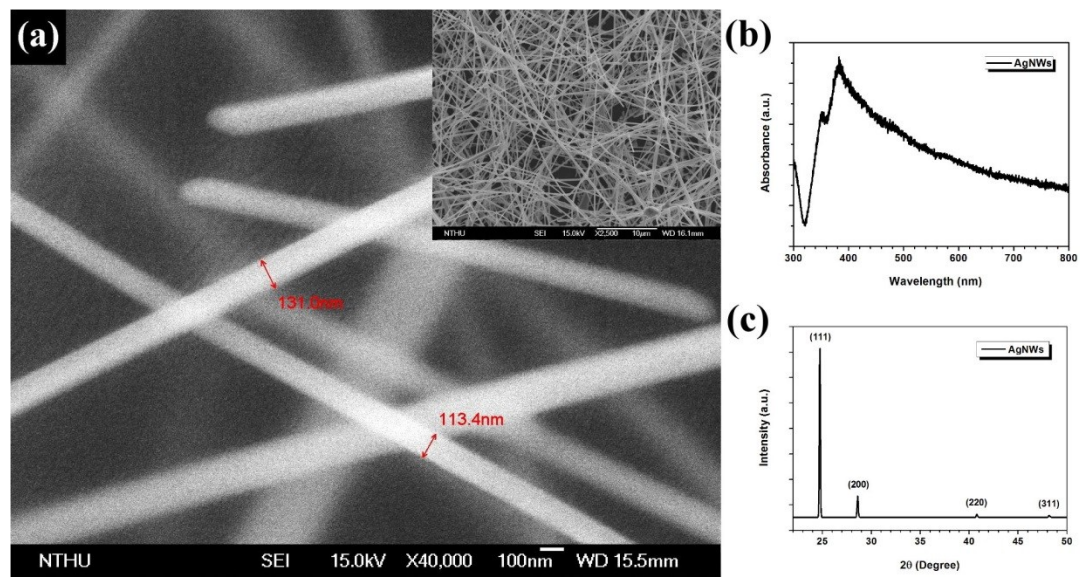

**Fig. S1** (a) The SEM image, (b) the UV-vis absorption spectrum and (c) the XRD pattern of the as-synthesized AgNWs.

## 2. $I^-/I_3^-$ erosion test of AgNWs and AgNWs@TiO<sub>2</sub>

To verify the protection of the TiO<sub>2</sub> surface coating against the erosion by  $I^-/I_3^-$  electrolyte, the AgNWs with and without TiO<sub>2</sub> surface coating were immersed in the  $I^-/I_3^-$  electrolyte for different periods. We utilized XRD to characterize the crystal structure of these samples. For the AgNWs without TiO<sub>2</sub> surface coating, as can be seen in Fig. S2a, the characteristic peaks of Ag disappeared immediately after 5 min immersion. For the AgNWs with TiO<sub>2</sub> surface coating, as can be seen in Fig. S2b, the crystal structure of the AgNWs could sustain after 2 hr immersion. This result demonstrated that the TiO<sub>2</sub> surface coating on the AgNWs could prevent the erosion by  $I^-/I_3^-$  electrolyte effectively.

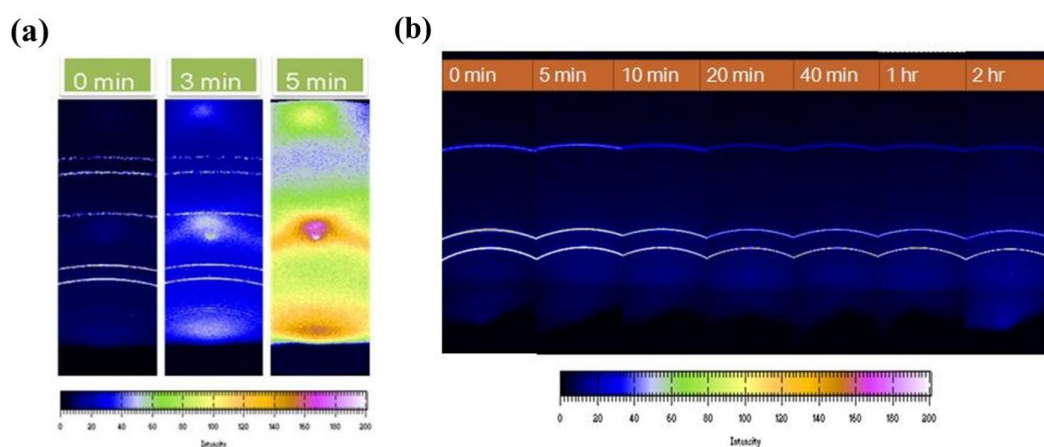

**Fig. S2** The XRD patterns of (a) the AgNWs without TiO<sub>2</sub> surface coating and (b) the AgNWs with TiO<sub>2</sub> surface coating immersed in the  $I^-/I_3^-$  electrolyte for different periods.

### 3. Photoanode thin film quality

As compared to the pure P25 thin film (shown in Fig. S4a), the defects such as pores and cracks appeared in the P25 photoanode thin film containing AgNWs@TiO<sub>2</sub> (shown in Fig. S4b). It is hard to analyze these defects quantitatively, however, the film quality of the P25 photoanode thin film containing AgNWs@TiO<sub>2</sub> degraded gradually with increasing the amount of AgNWs@TiO<sub>2</sub> in the P25 thin film as observed. The relatively huge structure of the AgNWs@TiO<sub>2</sub> compared to the P25 matrix would decrease the local interparticle connection. Also, the thermal shrinkage of the surface coated sol-gel TiO<sub>2</sub> could induce the film cracking.

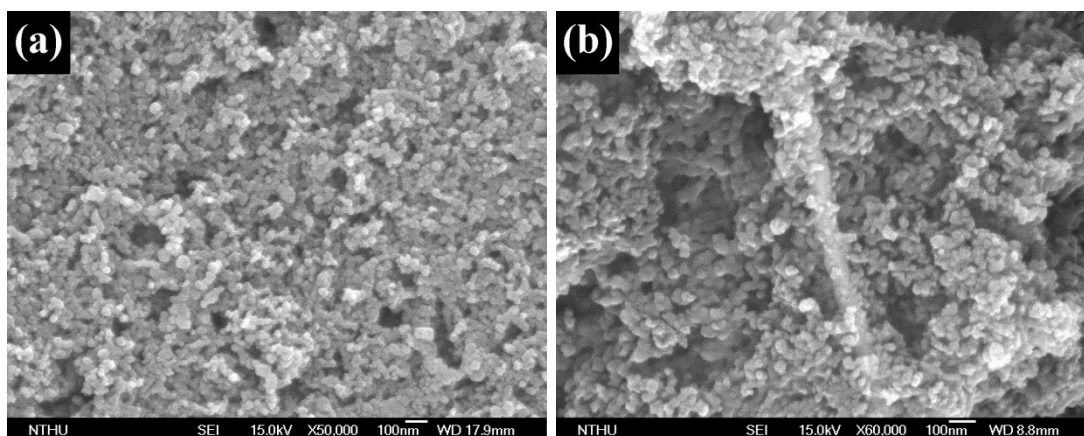

**Fig. S3** The SEM images of (a) the pure P25 thin film and (b) the P25 thin film containing AgNWs@TiO<sub>2</sub>.

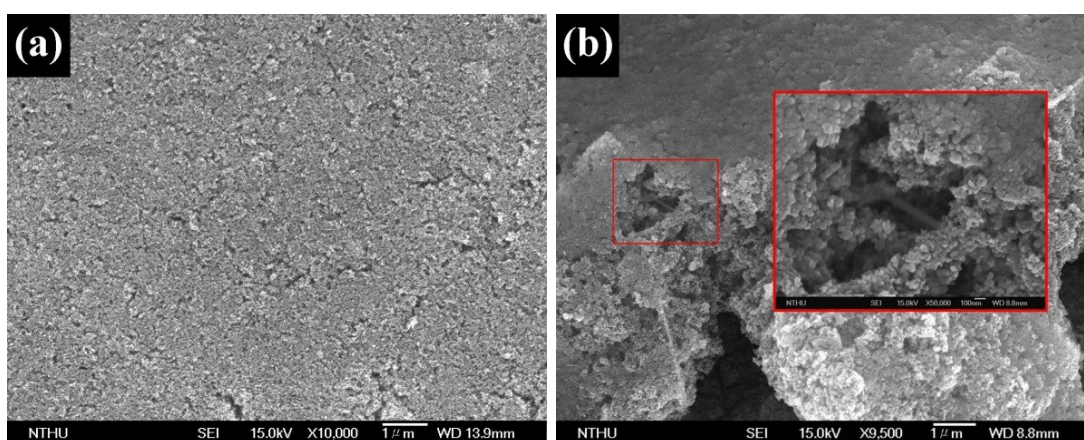

**Fig. S4** The SEM images of (a) the pure P25 thin film and (b) the P25 thin film

containing AgNWs@TiO<sub>2</sub>. The inset in Fig. S4b is the magnified image of the framed area.
